# Supplementary material for: Novel water-dispersible silicon nanoparticles as a fluorescent and colorimetric dual-mode probe for emodin detection
Source: Royal Society of Chemistry journal article supplement (doi:10.1039/d1nj01775f), 2021-01-01
Supplement: d1nj01775f1.pdf [file d1nj01775f1.pdf]

1     **Novel water-dispersible silicon nanoparticles as fluorescent and colorimetric**  
2                                   **dual-mode probe for emodin detection**

3 Congjie Pan <sup>a,1,\*</sup>, Qiaoqiao Wen <sup>a,1</sup>, Longfei Ma<sup>b</sup>, Xuezhen Qin <sup>a</sup>, Suxiang Feng <sup>a,\*</sup>

4

5 *<sup>a</sup> School of Pharmacy, Henan University of Chinese Medicine, Zhengzhou, 450046, PR*  
6 *China*

7 *<sup>b</sup> Henan Police College, Zhengzhou, 450046, China*

8

9

10

11 <sup>1</sup> C.J. Pan and Q.Q. Wen contributed equally to this work as first authors.

12 \*Corresponding author at: School of Pharmacy, Henan University of Chinese Medicine,  
13 Zhengzhou, 450046, China

14 *E-mail addresses:* pancongjie@hactcm.edu.cn (C.J. Pan); fengsx221@163.com (S.X.  
15 Feng).

## 16 **Reagents and materials**

17 (3-aminopropyl)triethoxysilane (APTES), ferulic acid, emodin, gallic acid,  
18 protocatechuic acid (PA), quercetin, chrysophanol, baicalin, berberine, physcion, and  
19 polygonin were obtained from Aladdin Chemical Co. Ltd.  $\text{NaH}_2\text{PO}_4 \cdot 2\text{H}_2\text{O}$  and  
20  $\text{Na}_2\text{HPO}_4 \cdot 12\text{H}_2\text{O}$  were purchased from Tianjin Fuchen Chemical Reagent Factory.  
21 Phosphate buffered saline solution (PBS) was prepared with 10 mM  $\text{NaH}_2\text{PO}_4$ -  
22  $\text{Na}_2\text{HPO}_4$ . Sodium chloride (NaCl), sodium sulfate ( $\text{Na}_2\text{SO}_4$ ), sodium nitrate ( $\text{NaNO}_3$ ),  
23 sodium hypochlorite (NaClO), potassium fluoride (KF), potassium bromide (KBr),  
24 silver nitrate ( $\text{AgNO}_3$ ), aluminium chloride ( $\text{AlCl}_3$ ), magnesium chloride ( $\text{MgCl}_2$ ),  
25 barium chloride ( $\text{BaCl}_2$ ), chromium trichloride ( $\text{CrCl}_3$ ), nickel chloride ( $\text{NiCl}_2$ ) and  
26 ferrous chloride ( $\text{FeCl}_2$ ) were received from Tianjin Kemiou Chemical Reagent Co.,  
27 Ltd. Potassium dichromate ( $\text{K}_2\text{Cr}_2\text{O}_7$ ) was purchased from Shanghai Lingfeng  
28 Chemical Co. Ltd. All reagents were analytical grade and used without further  
29 purification. Deionized water was used throughout the experiment.

## 30 **Apparatus and characterization**

31 Transmission electron microscopy (TEM) image of the SiNPs were obtained using  
32 a Tecnai G2F30 instrument. A drop of the SiNPs solution was placed on a copper grid  
33 coated with a thin layer of amorphous carbon film and dried at room temperature for  
34 the TEM analysis. Powder X-ray diffraction (PXRD) patterns were performed on a  
35 D/max 82400 X-ray powder diffractometer (Rigaku, Japan) with Cu  $K\alpha$  radiation ( $\lambda =$   
36 0.154056 nm). Fourier transform infrared spectrum (FT-IR) was conducted on a Bruker  
37 Tensor II spectrometer using KBr pellets. X-ray photoelectron spectroscopy (XPS)

38 measurement was performed using an AXIS Supra photoelectron spectrometer. UV-  
39 Vis absorption spectra were recorded by an EVOLUTION 260 BIO UV-Vis  
40 spectrophotometer. The fluorescence lifetime and quantum yield of the SiNPs were  
41 measured by Edinburgh FLS1000 steady/transient fluorescence spectrometer.  
42 Fluorescence measurements were carried out using an F-7000 spectrofluorophotometer  
43 with both excitation and emission slits set at 5 nm. The excitation wavelength was set  
44 at 409 nm. Absorption and emission measurements were conducted in 1 cm × 1 cm  
45 quartz cuvette.

#### 46 **Pretreatment process of the practical samples of traditional Chinese herbs**

47 The extraction process of emodin from *Rheum officinale* was as follows: Take 0.1  
48 g of *Rheum officinale* powder, 25 mL chloroform and 20 mL 2.5mol/L sulfuric acid  
49 solution into a round-bottom flask, weighed, and then refluxed at 80 °C for 2 hours.  
50 After cooling to room temperature, the resulted solution was weighed again and then  
51 the weight loss was complemented with chloroform. 10 mL of the chloroform layer was  
52 evaporated and dried. The obtained residue was dissolved by 10 mL methanol and the  
53 solution was filtered. Finally, the filtrate was taken for testing.

54 The extraction process of *Polygonum cuspidatum* was similar to that of *Rheum*  
55 *officinale*. The details were as follows: Take 0.15 g of *Polygonum cuspidatum* powder  
56 and 25 mL of methanol solution into a round-bottom flask, weighed, and then refluxed  
57 at 75 °C for 1 hours. After cooling to room temperature, the resulted solution was  
58 weighed again and then the weight loss was complemented with methanol. The resulted  
59 solution was filtered and 5 mL of filtrate was evaporated and dried. The obtained

60 residue was dissolved by 10 mL of 8% hydrochloric acid solution. 2 mL of the above  
61 solution was mixed with 10 mL chloroform. The mixture solution was then refluxed at  
62 90 °C for 1 hours. The acid layer was washed with chloroform (3×10 mL) and the  
63 resulted solution was combined with chloroform layer. Excess solvent was removed by  
64 evaporation. The obtained residue was dissolved by 10 mL methanol and the solution  
65 was filtered. Finally, the filtrate was taken for testing.

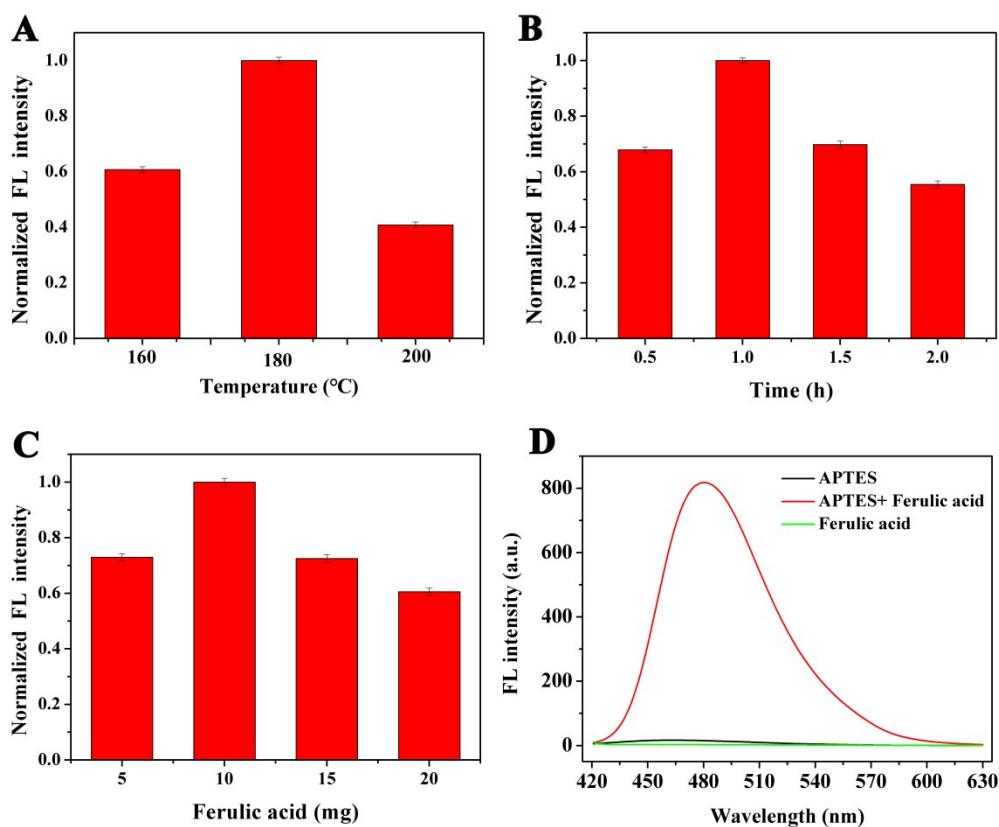

66

67 **Figure S1** Normalized FL intensity of the SiNPs synthesized at different reaction

68 temperature (A), different reaction time (B) and different weight of ferulic acid (C);

69 The fluorescence emission spectra of the materials prepared by the reaction of only

70 APTES, only ferulic acid, and APTES+ferulic acid under the same conditions (D).

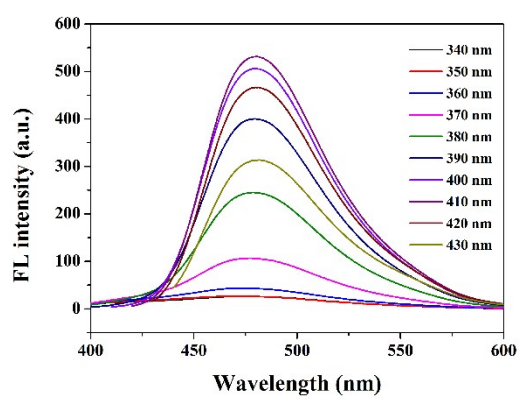

71

72 **Figure S2** FL intensity of the prepared SiNPs at different excitation wavelengths.

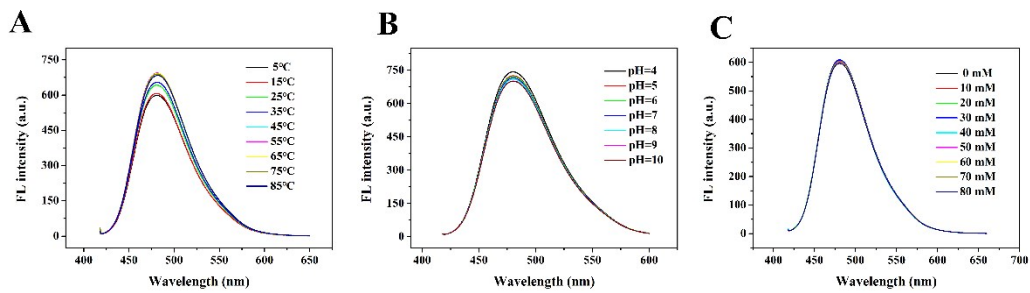

73

74 **Figure S3** The fluorescence emission spectra of the SiNPs under different temperature

75 (A), pH (B) and concentration of NaCl (C).

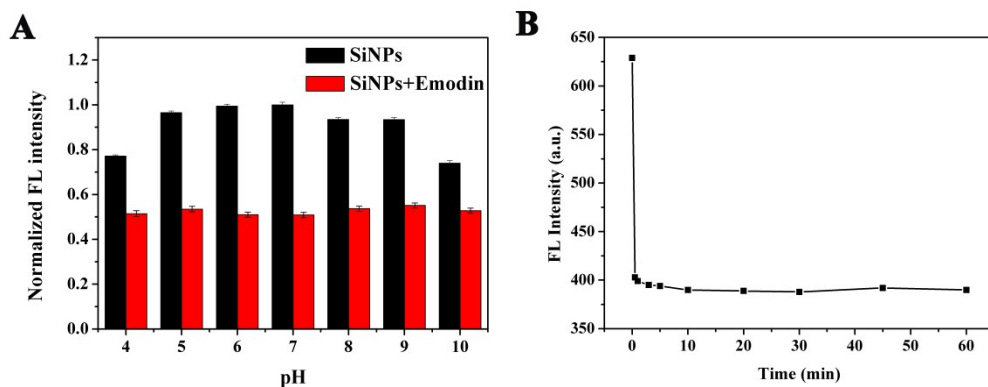

76

77 **Figure S4** (A) Normalized FL intensity of the SiNPs (black bars) and the subsequent

78 addition of 20  $\mu\text{M}$  emodin (red bars) at different pH values. (B) Time-dependent FL

79 intensity of the SiNPs with the addition of emodin (20  $\mu\text{M}$ ) at room temperature.



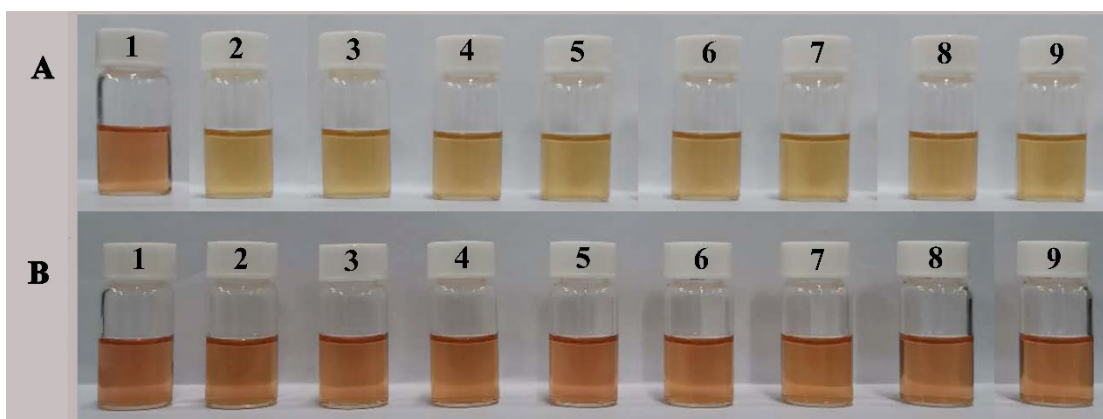

80

81 **Figure S5** (A) Photographs of the mixture solution of SiNPs mixed with 20  $\mu$ M emodin  
 82 or other different interfering substances (from left to right: 1. emodin, 2. gallic acid, 3.  
 83 PA, 4. quercetin, 5. chrysophanol, 6. baicalin, 7. berberine, 8. physcion, and 9.  
 84 polygonin); (B) Photographs of the mixture solution of SiNPs, mixed with 20  
 85  $\mu$ M emodin and other interfering substances (from left to right: 1. blank, 2. gallic acid,  
 86 3. PA, 4. quercetin, 5. chrysophanol, 6. baicalin, 7. berberine, 8. physcion, and 9.  
 87 polygonin). The concentration of emodin was 20  $\mu$ M; the concentration of each  
 88 interfering substance was 40  $\mu$ M.

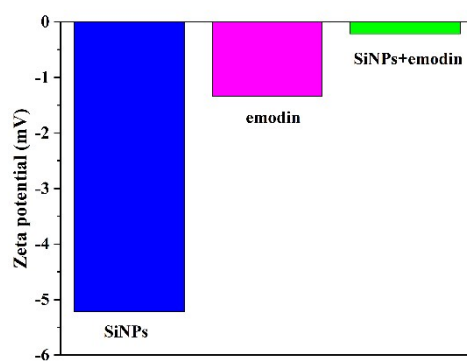

89

90 **Figure S6** Zeta potentials of the SiNPs, emodin and the mixtures of the SiNPs and

91 emodin in a pH 7.0 PBS solution.

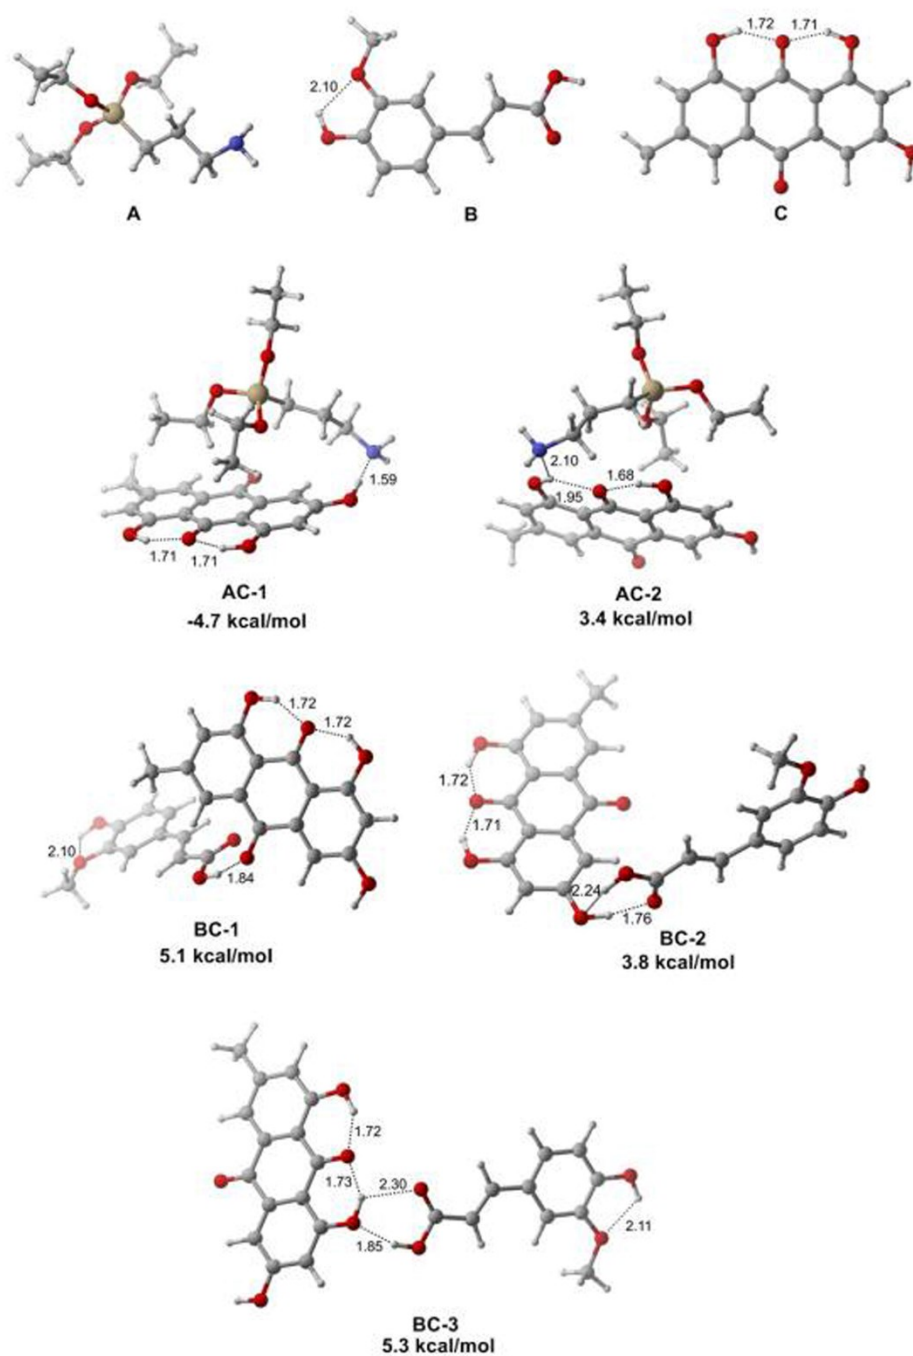

93

94 **Figure S7** Optimized structures of APTES (A), ferulic acid (B), emodin (C) and the  
 95 corresponding HB complexes and their relative Gibbs free energies. Distances were in  
 96 Å. The Gibbs free energies of A, B and C were set to 0.0 kcal/mol as references.

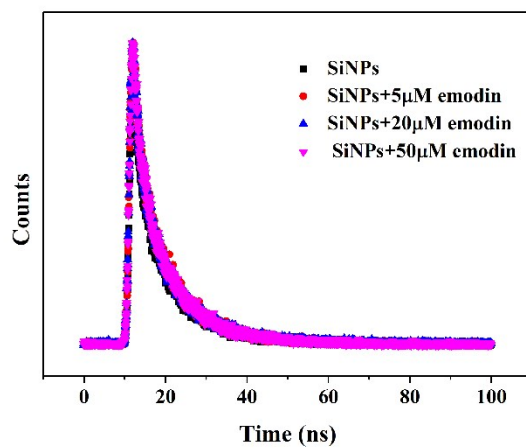

97

98 **Figure S8** Time-resolved decay curves of the SiNPs in the absence and presence of

99 emodin.

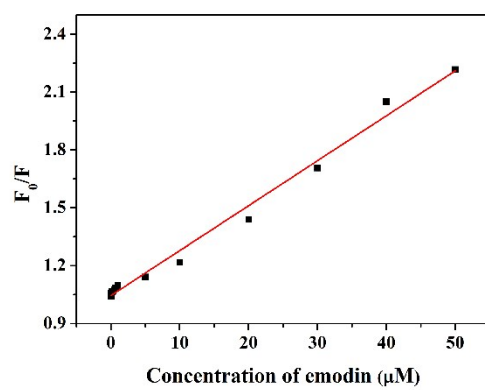

100

101 **Figure S9**  $F_0/F$  of the SiNPs as a function of the concentration of emodin.

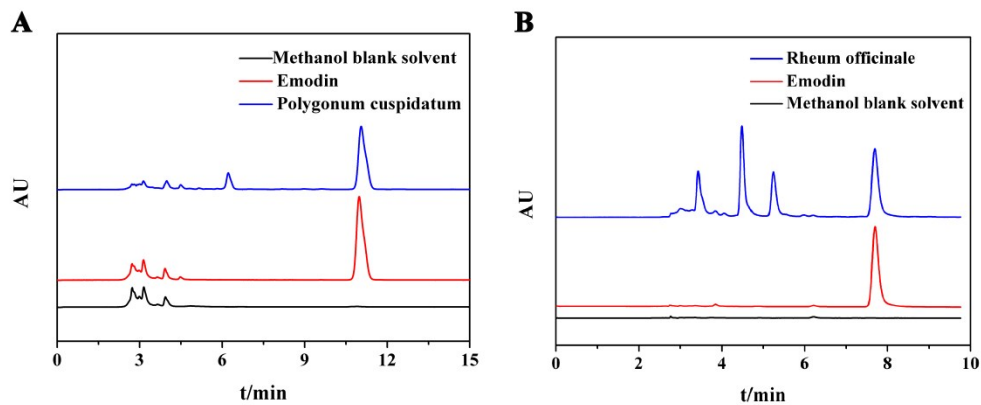

102

103 **Figure S10** High performance liquid chromatography of (A) *Polygonum cuspidatum*,

104 emodin and methanol blank solvent; (B) *Rheum officinale*, emodin and methanol blank

105 solvent (Detection conditions: mobile phase: methanol~0.1% phosphoric acid water

106 (85:15), flow rate: 1.0 mL/min, column temperature: 30 °C, detection wavelength: 254

107 nm).

108 **Table S1** Influence of different emodin concentrations on fluorescence lifetime of the  
109 SiNPs.

| Concentration of emodin ( $\mu\text{M}$ ) | Fluorescence lifetime (ns) |
|-------------------------------------------|----------------------------|
| 0                                         | 8.83                       |
| 5                                         | 8.93                       |
| 20                                        | 8.86                       |
| 50                                        | 8.82                       |

110

111 **Table S2** Determination of emodin in *Rheum officinale* and *Polygonum cuspidatum*

112 with different methods.

|           | Rheum officinale (mg/g) | Polygonum cuspidatum (mg/g) |
|-----------|-------------------------|-----------------------------|
| This work | 9.83±0.12               | 4.40±0.07                   |
| HPLC      | 9.68±0.11               | 4.76±0.01                   |

113
